# Supplementary material for: Milk Formula Enriched with Sodium Butyrate Influences Small Intestine Contractility in Neonatal Pigs
Source: MDPI journal article supplement (doi:10.3390/nu14204301), 2022-10-14
Supplement: s1 [file s1]

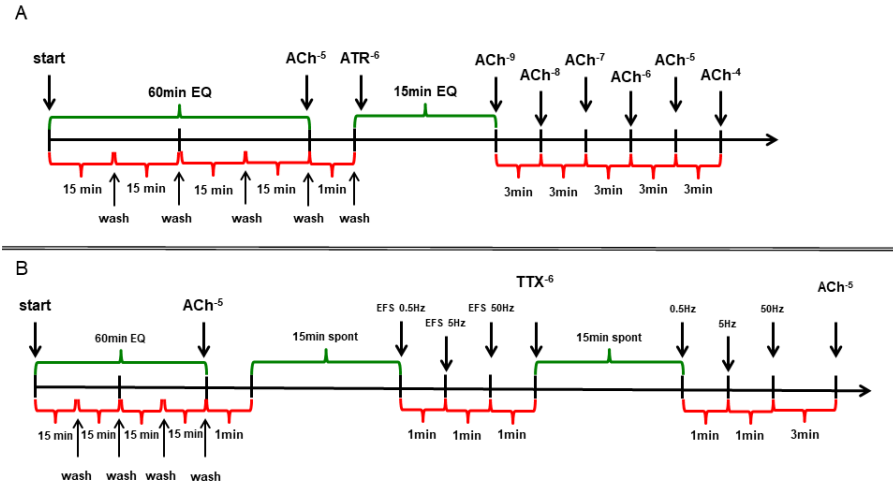

**Figure S1.** The scheme of an in vitro study on isolated fragments of the small intestine of newborn piglets.

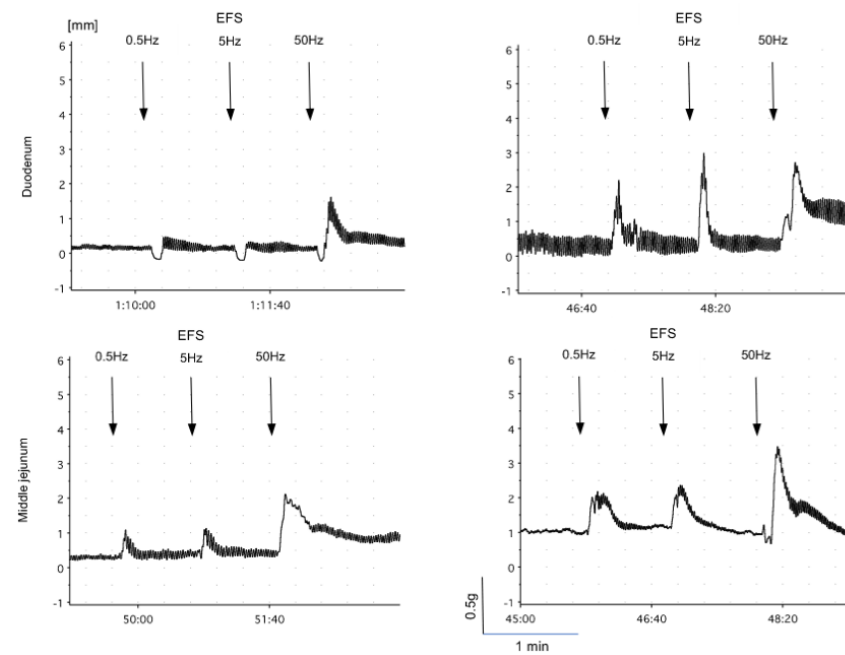

**Figure S2.** Electric field stimulation (EFS) induction of contraction amplitude (mm) in the duodenum and middle section of the jejunum of piglets.
